# Supplementary material for: Chemometric Differentiation of White Wines from a Low-Aromatic Grape Obtained by Spontaneous Fermentation, Enriched with Non-Saccharomyces, or with a High-Glutathione-Producing Saccharomyces Yeast
Source: MDPI journal article supplement (doi:10.3390/fermentation9121023), 2023-12-15

**Table S1.** Loadings obtained from the data matrix of major volatile compounds used as chemical variables to build the PCA of wines.

|                            | CAS        | Component 1 | Component 2 |
|----------------------------|------------|-------------|-------------|
| Acetaldehyde               | 75-07-0    | 0.298       | - 0.190     |
| Ethyl acetate              | 141-78-6   | 0.302       | - 0.061     |
| 1,1-Diethoxyethane         | 105-57-7   | 0.315       | - 0.126     |
| Methanol                   | 67-56-1    | - 0.202     | - 0.292     |
| 1-Propanol                 | 71-23-8    | 0.337       | - 0.074     |
| Isobutanol                 | 78-83-1    | 0.152       | 0.351       |
| 2-Methyl-1-butanol         | 137-32-6   | 0.214       | 0.257       |
| 3-Methyl-1-butanol         | 123-51-3   | 0.225       | 0.236       |
| Acetoin                    | 513-86-0   | 0.333       | 0.097       |
| Ethyl lactate              | 97-64-3    | 0.331       | 0.091       |
| 2,3-Butanediol <i>levo</i> | 24347-58-8 | - 0.126     | 0.413       |
| 2,3-Butanediol <i>meso</i> | 5341-95-7  | - 0.051     | 0.464       |
| Diethyl succinate          | 123-25-1   | - 0.272     | 0.259       |
| 2-Phenylethanol            | 60-12-8    | 0.289       | 0.168       |
| Glycerol                   | 56-81-5    | 0.235       | 0.331       |

**Table S2.** Loadings obtained from the data matrix of minor volatile compounds used as chemical variables to build the PCA of wines.

|                              | CAS         | Component 1   | Component 2   | Component 3   |
|------------------------------|-------------|---------------|---------------|---------------|
| 2-Furanmethanol              | 98-00-0     | 0,100         | 0,170         | <b>-0,262</b> |
| 1-Hexadecanol                | 36653-82-4  | 0,195         | -0,155        | <b>-0,220</b> |
| 1-Tetradecanol               | 112-72-1    | 0,097         | 0,006         | <b>0,334</b>  |
| 2-Ethyl-1-hexanol            | 104-76-7    | -0,080        | 0,178         | -0,050        |
| Octanoic acid                | 124-07-2    | 0,194         | 0,174         | -0,124        |
| n-Decanoic acid              | 334-48-5    | 0,169         | 0,011         | <b>-0,284</b> |
| Ethyl isobutyrate            | 97-62-1     | <b>-0,248</b> | -0,171        | -0,015        |
| Ethyl butanoate              | 105-54-4    | -0,004        | <b>0,253</b>  | -0,079        |
| Ethyl hexanoate              | 123-66-0    | <b>0,239</b>  | 0,175         | -0,007        |
| Ethyl octanoate              | 106-32-1    | <b>0,258</b>  | -0,013        | 0,046         |
| Ethyl 9-decenoate            | 67233-91-4  | <b>0,241</b>  | -0,108        | 0,161         |
| Ethyl decanoate              | 110-38-3    | <b>0,202</b>  | 0,058         | -0,061        |
| Ethyl dodecanoate            | 106-33-2    | -0,134        | 0,123         | 0,147         |
| Ethyl 3-hydroxytridecanoate  | 107141-15-1 | 0,195         | -0,152        | <b>-0,210</b> |
| Ethyl tetradecanoate         | 124-06-1    | 0,131         | -0,020        | -0,057        |
| Ethyl hexadecanoate          | 628-97-7    | 0,077         | 0,149         | -0,063        |
| Ethyl 4-ethoxybenzoate       | 23676-09-7  | <b>-0,251</b> | -0,169        | -0,012        |
| 3-Methyl-1 butanol acetate   | 123-92-2    | 0,175         | -0,136        | <b>0,215</b>  |
| 2-Methyl-1 butanol acetate   | 624-41-9    | <b>-0,230</b> | -0,114        | 0,056         |
| Dihydro methyl jasmonate     | 24851-98-7  | <b>0,227</b>  | -0,143        | -0,026        |
| Methyl hydrojasmonate        | 39924-52-2  | <b>-0,207</b> | <b>0,202</b>  | 0,006         |
| 1H-Indole-3-ethanol, acetate | 13137-14-9  | 0,097         | 0,011         | <b>0,349</b>  |
| δ-Dodecalactone              | 713-95-1    | <b>-0,231</b> | -0,171        | -0,015        |
| β-Pinene                     | 127-91-3    | 0,090         | 0,010         | <b>0,347</b>  |
| D-Limonene                   | 5989-27-5   | 0,079         | -0,014        | <b>0,310</b>  |
| Nerolidol                    | 142-50-7    | -0,041        | <b>0,319</b>  | -0,121        |
| Geranyl acetone              | 689-67-8    | <b>0,255</b>  | -0,134        | 0,076         |
| Farnesol                     | 4602-84-0   | 0,009         | <b>0,327</b>  | -0,025        |
| Benzophenone                 | 119-61-9    | 0,195         | -0,156        | <b>-0,217</b> |
| 2,4-Di-tert-butylphenol      | 96-76-4     | <b>-0,206</b> | 0,047         | 0,023         |
| Decanal                      | 112-31-2    | -0,186        | -0,113        | -0,120        |
| Cyclododecane                | 294-62-2    | -0,052        | <b>-0,285</b> | <b>-0,200</b> |
| 1-Decene                     | 872-05-9    | 0,047         | <b>0,291</b>  | 0,188         |

|                                                                   |           |        |              |        |
|-------------------------------------------------------------------|-----------|--------|--------------|--------|
| 2,5-Cyclohexadien-1-one, 2,6-bis(1,1-dimethylethyl)-4-ethylidene- | 6738-27-8 | -0,042 | <b>0,319</b> | -0,122 |
|-------------------------------------------------------------------|-----------|--------|--------------|--------|

**Figure S1.** Fermentation progress. Starter cultures supplied to grape must: WY spontaneous fermentation without starter addition. SC *Saccharomyces cerevisiae* glutathione over-producing. MP: *Mestchnikovia pulcherrima*. LT: *Lachancea thermotolerans*.

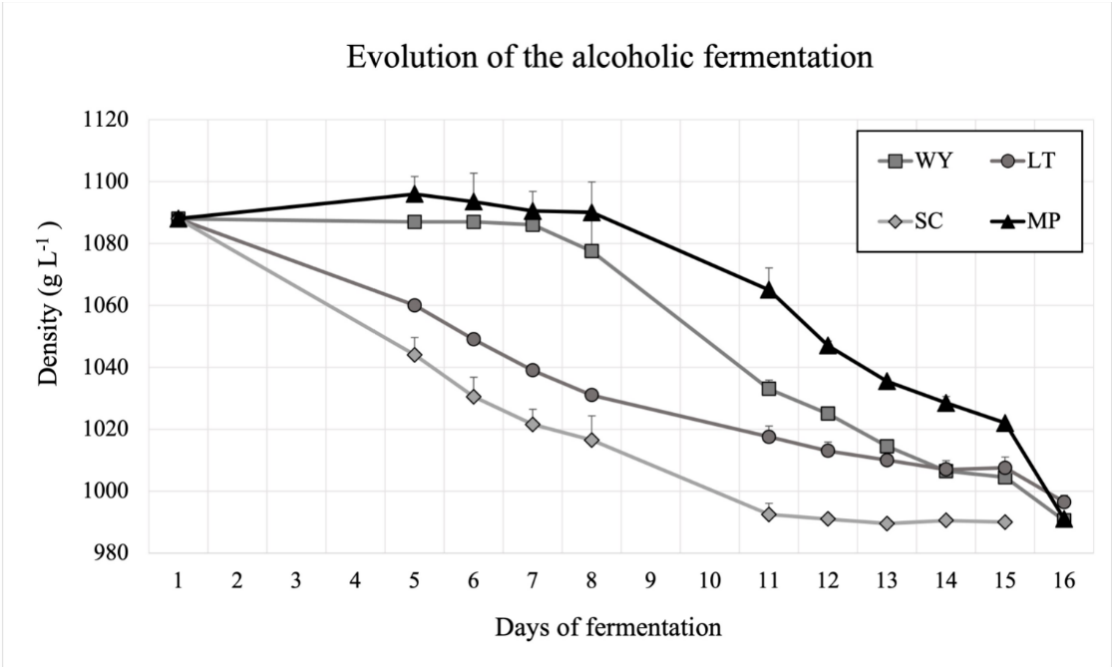

Supplement: s1 [file s1]
